# Supplementary material for: A series of entangled ZnII/CdII coordination polymers constructed from 1,3,5-benzenetricarboxylate acid and flexible triazole ligands
Source: Royal Society of Chemistry journal article supplement (doi:10.1039/c3ce41157e), 2013-01-01
Supplement: c3ce41157e.pdf [file c3ce41157e.pdf]

## Supporting Information

### A series of entangled Zn<sup>II</sup>/Cd<sup>II</sup> coordination polymers constructed from 1,3,5-benzenetricarboxylate acid and triazole ligands

Yu-Hui Luo<sup>a</sup>, Feng-Xia Yue<sup>a</sup>, Xiao-Yang Yu<sup>a,c</sup>, Ling-Ling Gu<sup>b</sup>, Hong Zhang<sup>\*a</sup>, and

Xin Chen<sup>\*b</sup>

<sup>a</sup> Institute of Polyoxometalate Chemistry, Department of Chemistry, Northeast Normal University, Changchun, Jilin 130024, P. R. China

<sup>b</sup> School of Pharmaceutical & Life Sciences, Changzhou University, Changzhou, Jiangsu, 213164, P. R. China

<sup>c</sup> College of Chemical and Pharmaceutical Engineering, Jilin Institute of Chemical Technology, Jilin City, Jilin, 132022, P. R. China

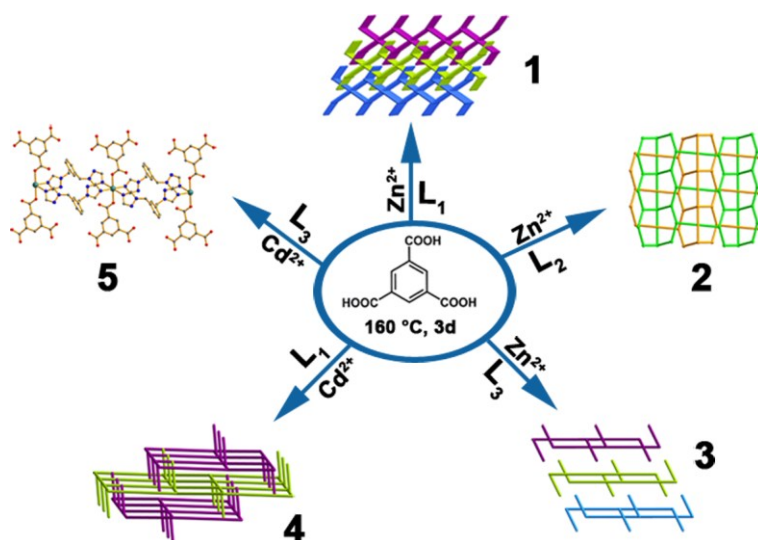

Scheme S1. Synthetic route of the title compounds.

**Scheme S2.** Coordination modes of H<sub>3</sub>BTC in **1-5**, model a for **1** and **3**, model b for **2**, model c for **4** and model d for **5**.

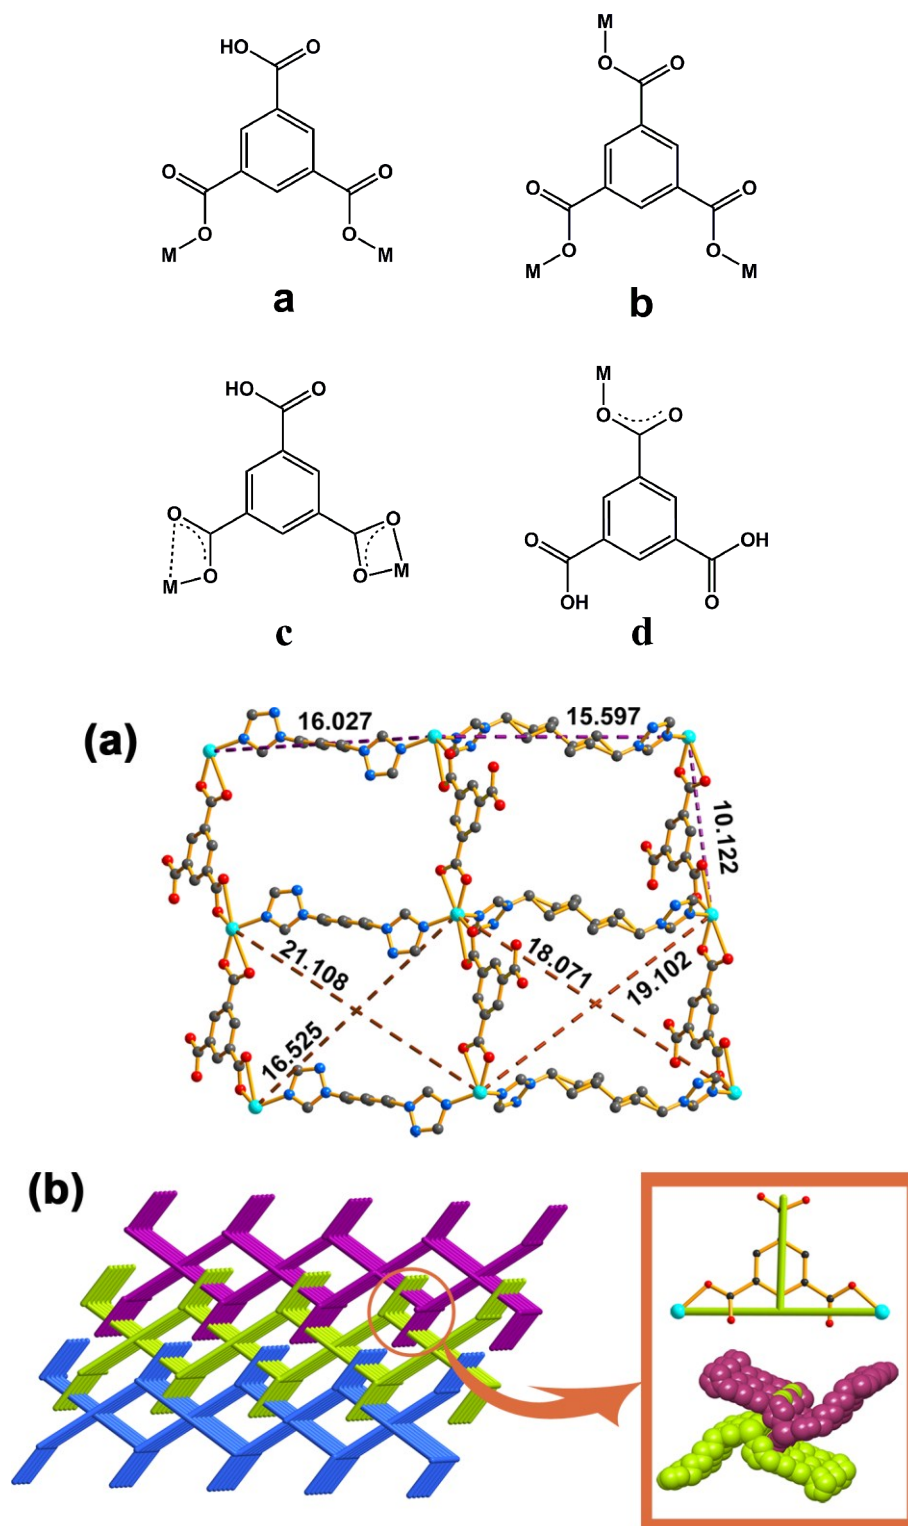

**Fig. S1** (a) View of 4<sup>4</sup>-sql layer of **1**. Zn...Zn distances (Å) are shown in dashed line. (b) Schematic description of 2D→3D interdigitated structure of **1**.

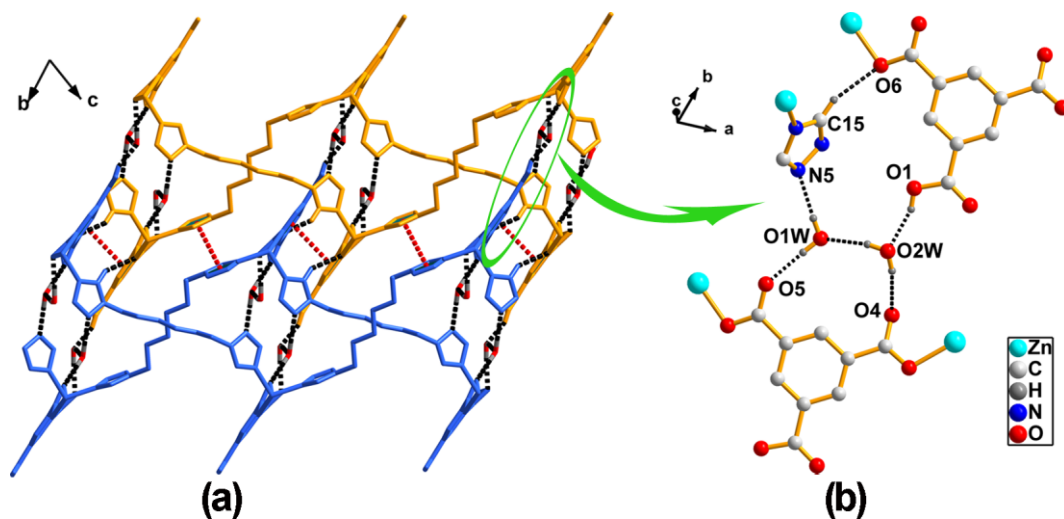

**Fig. S2** (a) 2D layers of **1** are further linked into a 3D supramolecular structure by hydrogen-bonding interactions (dashed black lines) and  $\pi \cdots \pi$  interactions (dashed red lines). (b) A partial schematic view of hydrogen bonds of **1**.

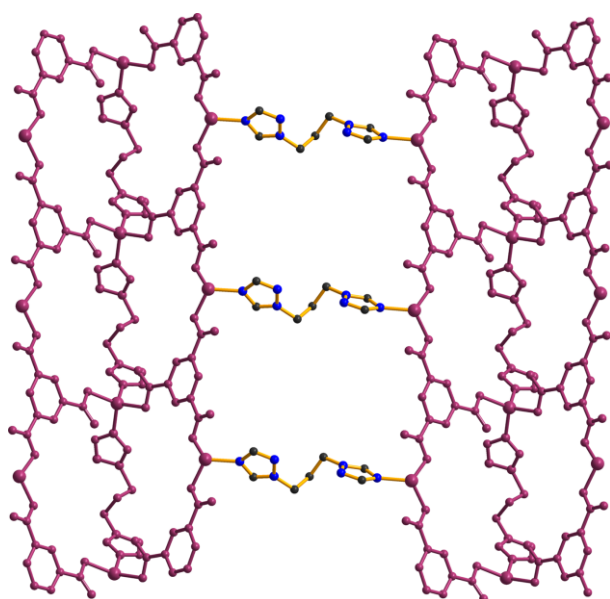

**Fig. S3** The pentalene-like units enhance into 1D chain through edge-sharing (showing in purple), and the chains are further linked into 2D wave-shaped layer by L<sub>2</sub> ligands.

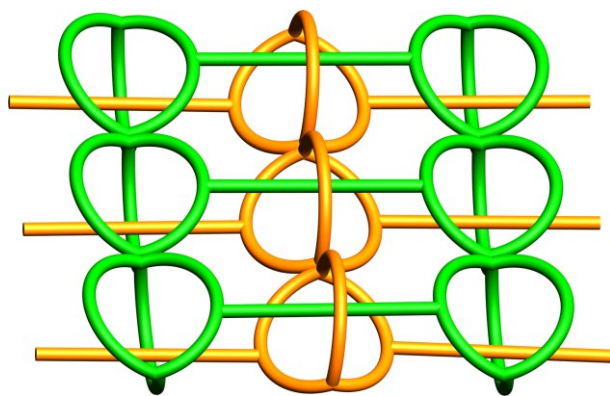

**Fig. S4** Schematic description of 2D→2D entangled structure of **2** with the coexistence of polycatenation and polythreading.

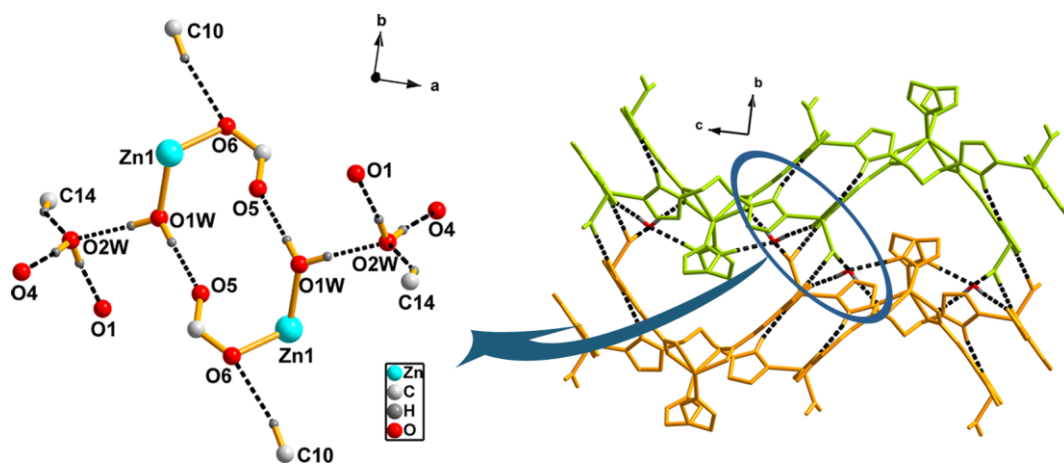

**Fig. S5** A partial schematic view of hydrogen bonds in **2**.

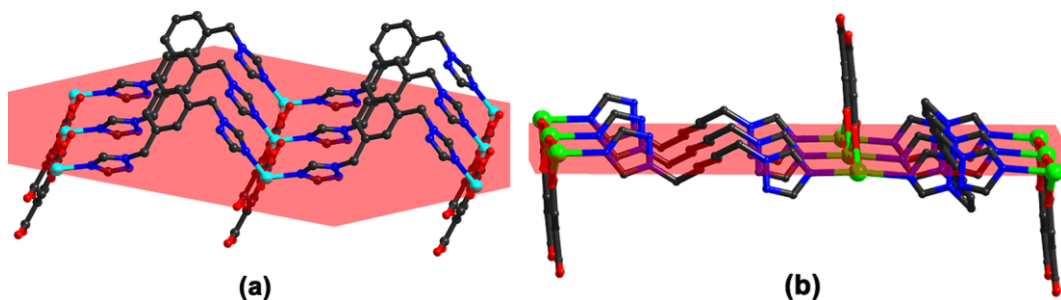

**Fig. S6** (a) The Zn atoms in each independent layer of **3** nearly lie in the same horizontal plane. (b) The Cd atoms in each independent layer of **4** nearly lie in the same horizontal plane.

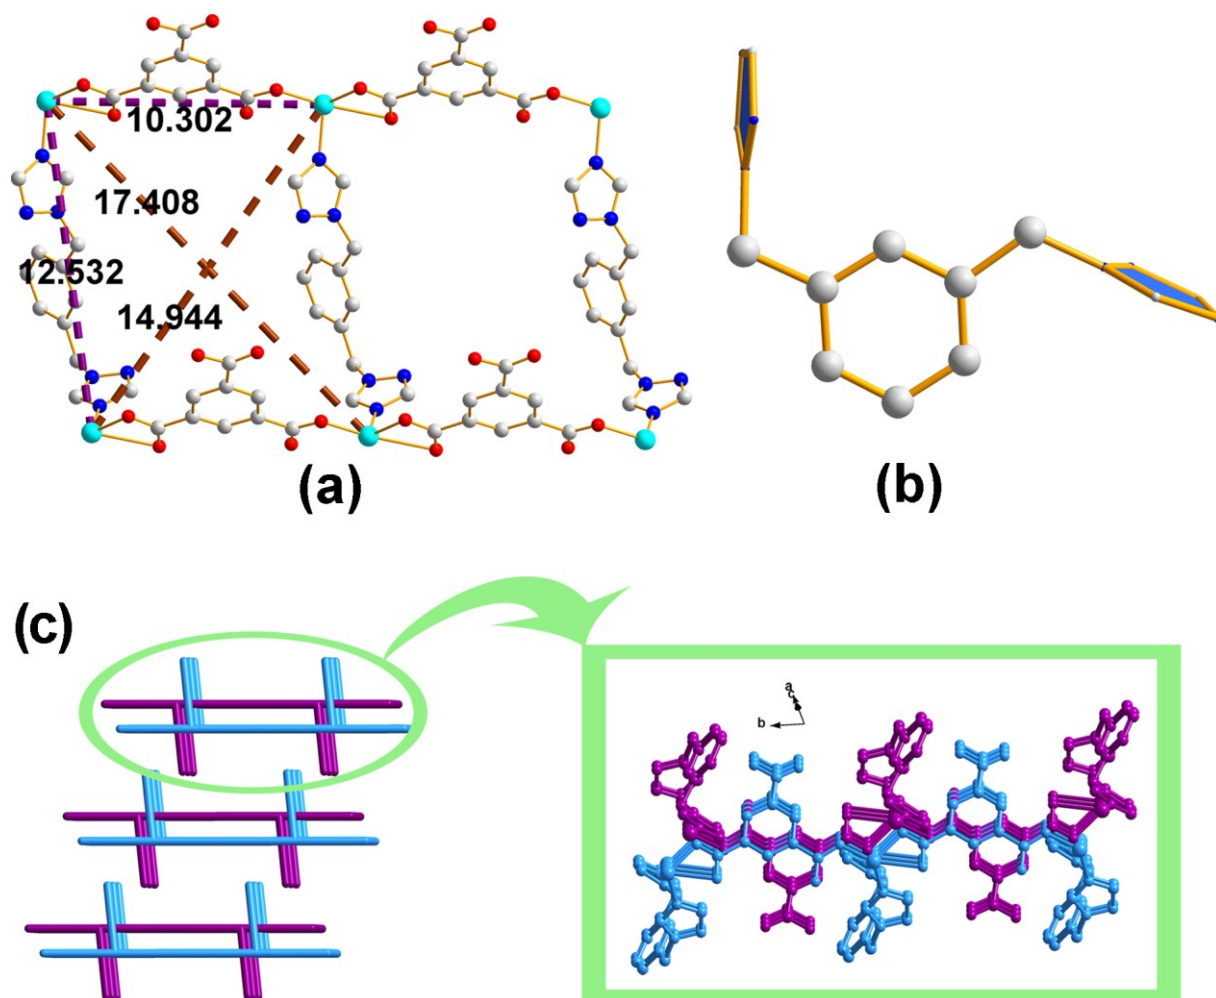

**Fig. S7** (a) The bridged Zn···Zn distances (Å) in **3**. (b) View of *anti*-coordination model of  $L_3$  ligand. (c) View of 2D→2D polythreaded network of **3**.

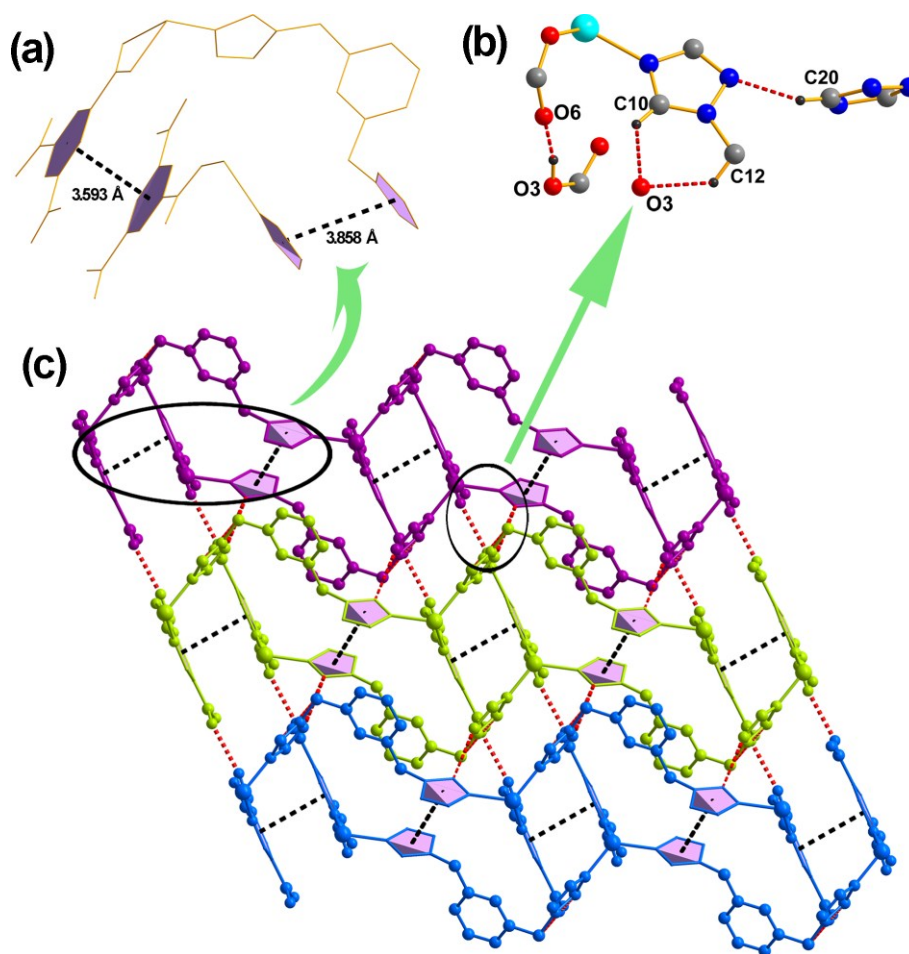

**Fig. S8** (a) A partial schematic view of  $\pi \cdots \pi$  interactions in **3**. (b) A partial schematic view of hydrogen bonds in **3**. (c) 3D supramolecular architecture based on hydrogen-bonding interactions and  $\pi \cdots \pi$  interactions.

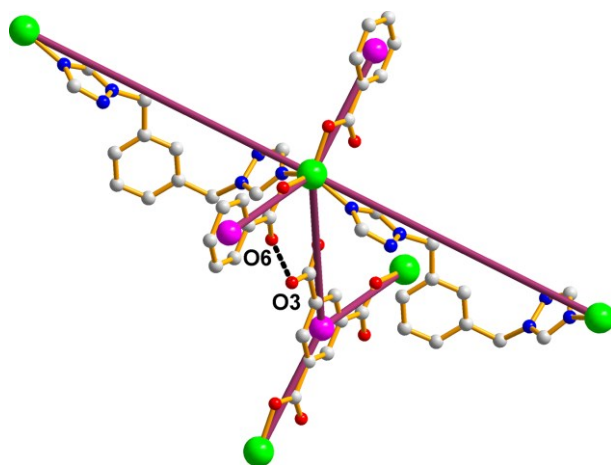

**Fig. S9** For **3**, when O3–H3 $\cdots$ O6 hydrogen bond is taken into consideration, the ZnO<sub>2</sub>N<sub>2</sub> tetrahedral geometry can be seen as a 5-connected node (big green ball), and the HBTC<sup>2-</sup> ligand can be considered as a 3-connected node (big pink ball).

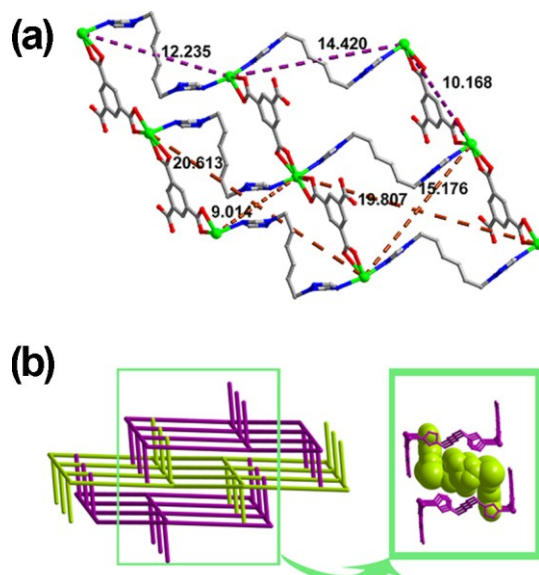

**Fig. S10** (a) View of  $4^4$ -sq layer of 4. The Cd...Cd distances (Å) are shown in dashed line. (b) Schematic description of 2D→3D interdigitation.

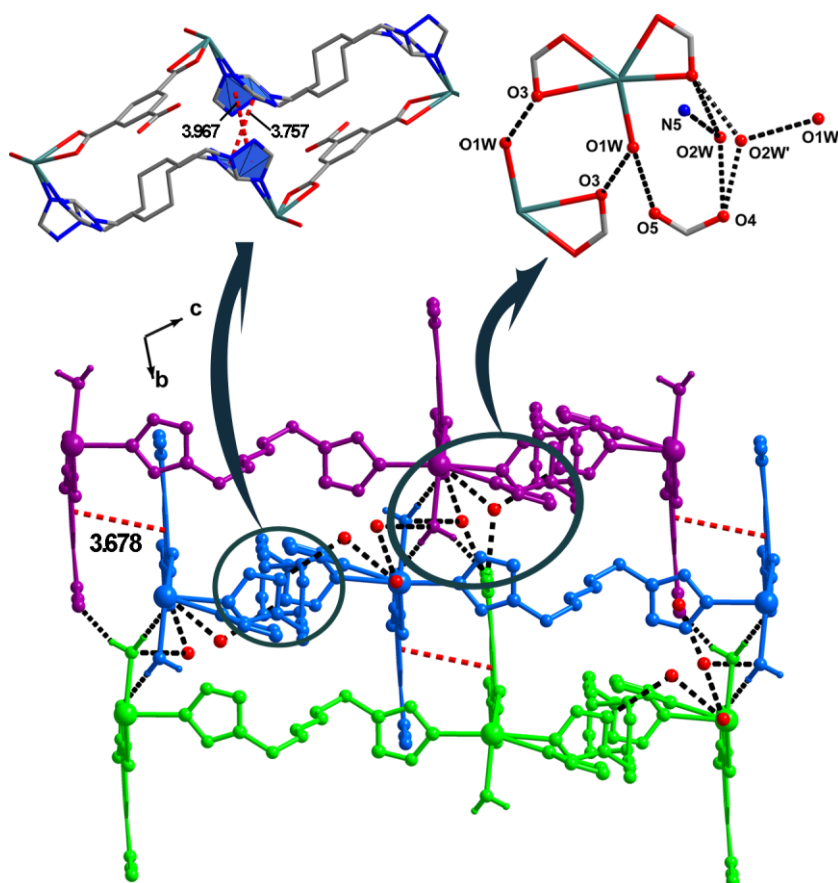

**Fig. S11** Partial schematic view of hydrogen bonds (dashed black line) and  $\pi$ ... $\pi$  interactions (dashed red line) in 4.

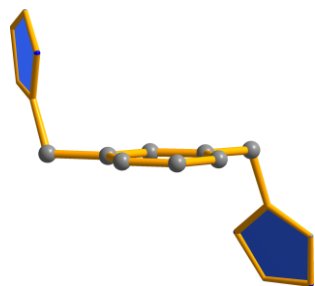

Fig. S12 View of *anti*-coordination model of L<sub>3</sub> ligand in **5**.

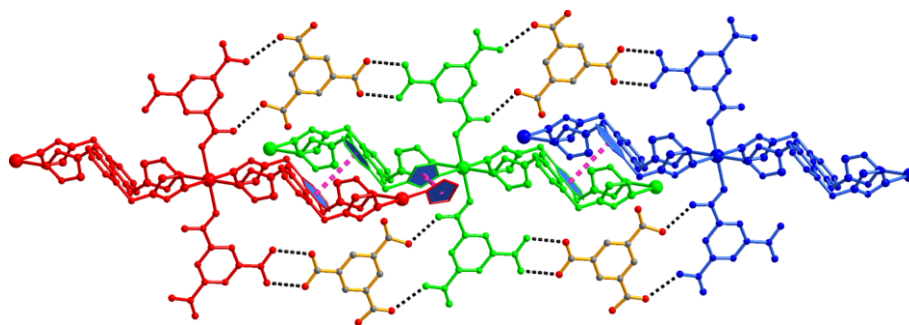

Fig. S13 1D chains of **5** are connected into 2D layer by noncovalent interactions (hydrogen-bonding interactions are shown in dashed black line and  $\pi \cdots \pi$  interactions are shown in dashed pink line).

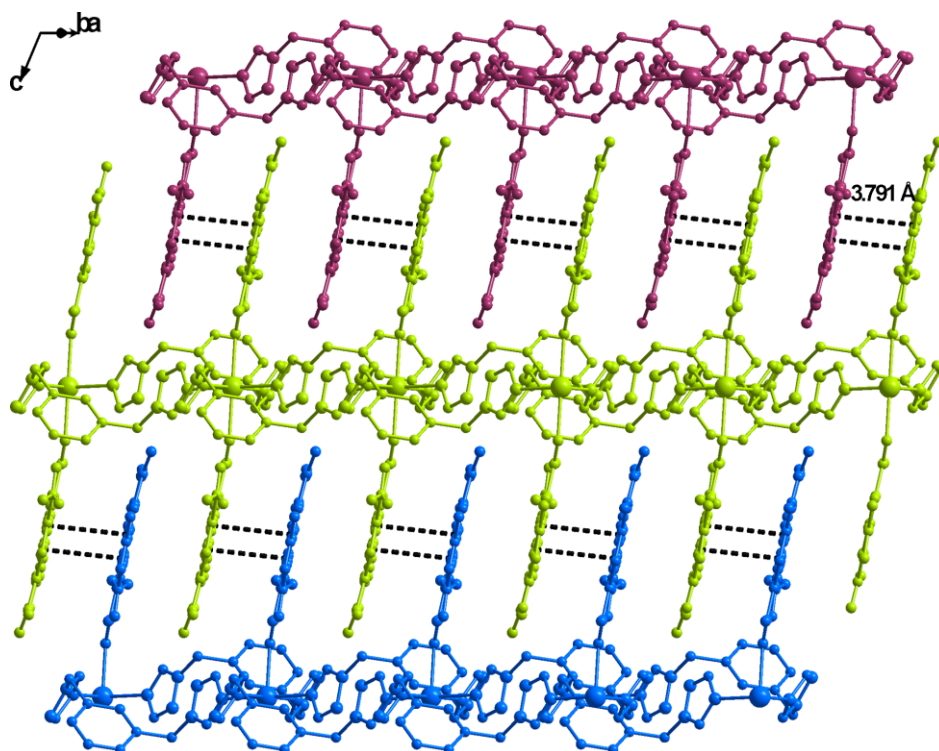

Fig. S14 View of 3D supramolecular architecture of **5**. The dashed black lines indicate  $\pi \cdots \pi$  interactions of Cg(3)>Cg(4): 3.791(12) Å (Cg(3): C2, C3, C4, C5, C6, C7; Cg(4): C13, C14, C15, C16, C17, C18).



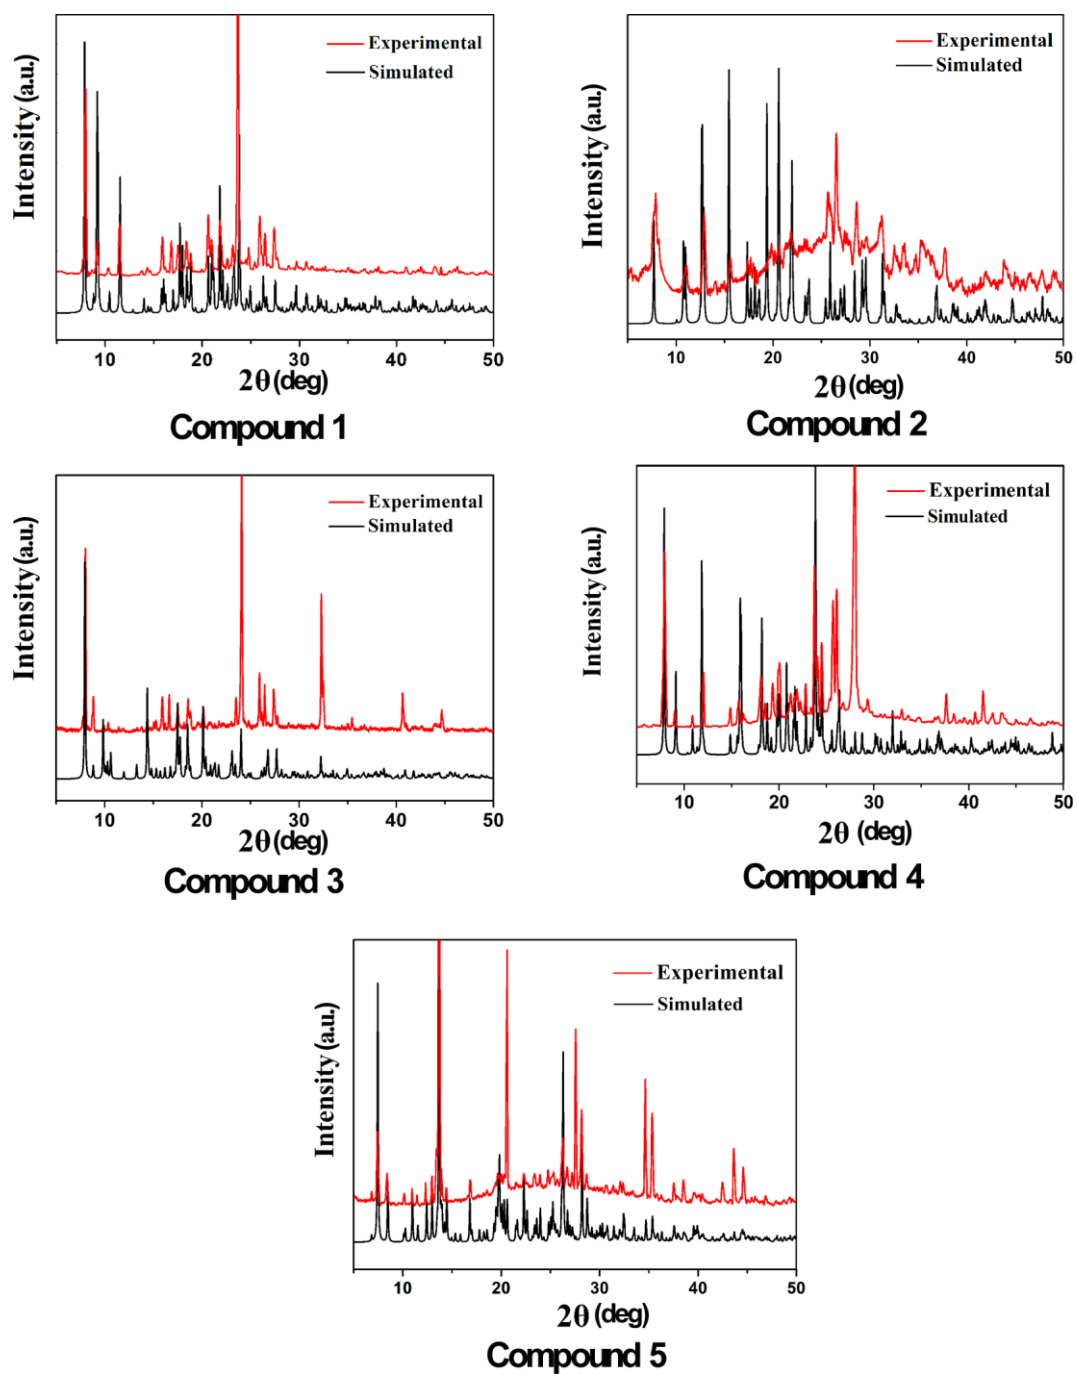

Fig. S15 The PXRD patterns of 1-5.

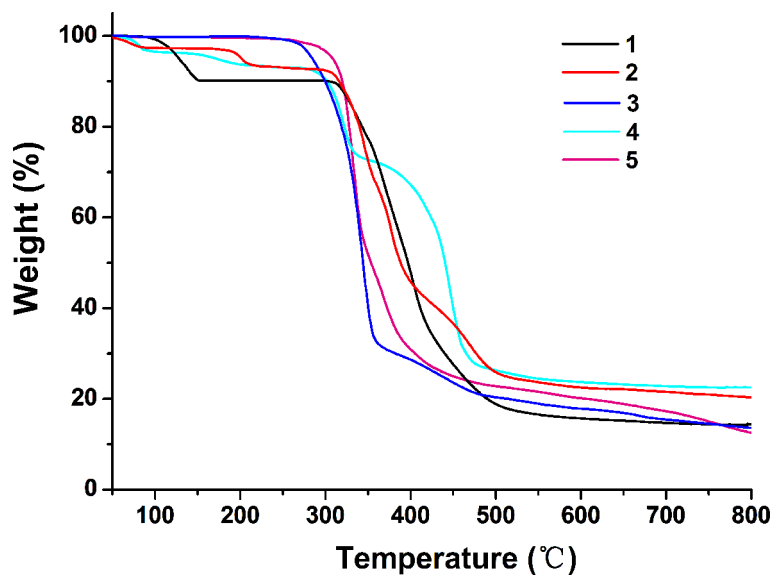

Fig. S16 Thermogravimetric analysis curves of 1-5.

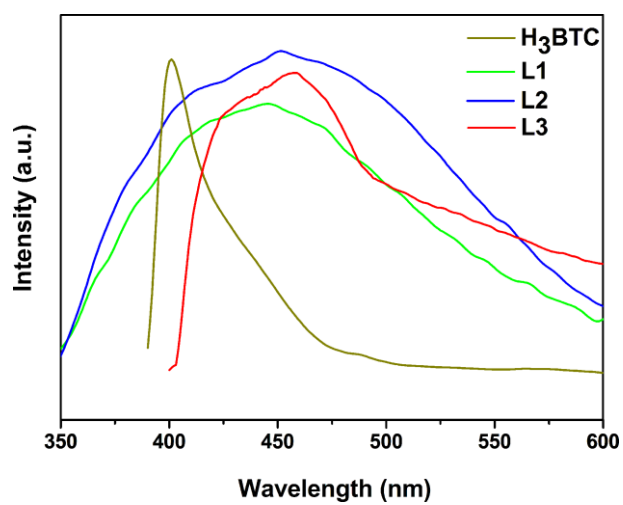

Fig. S17 Emission spectra of free ligands.

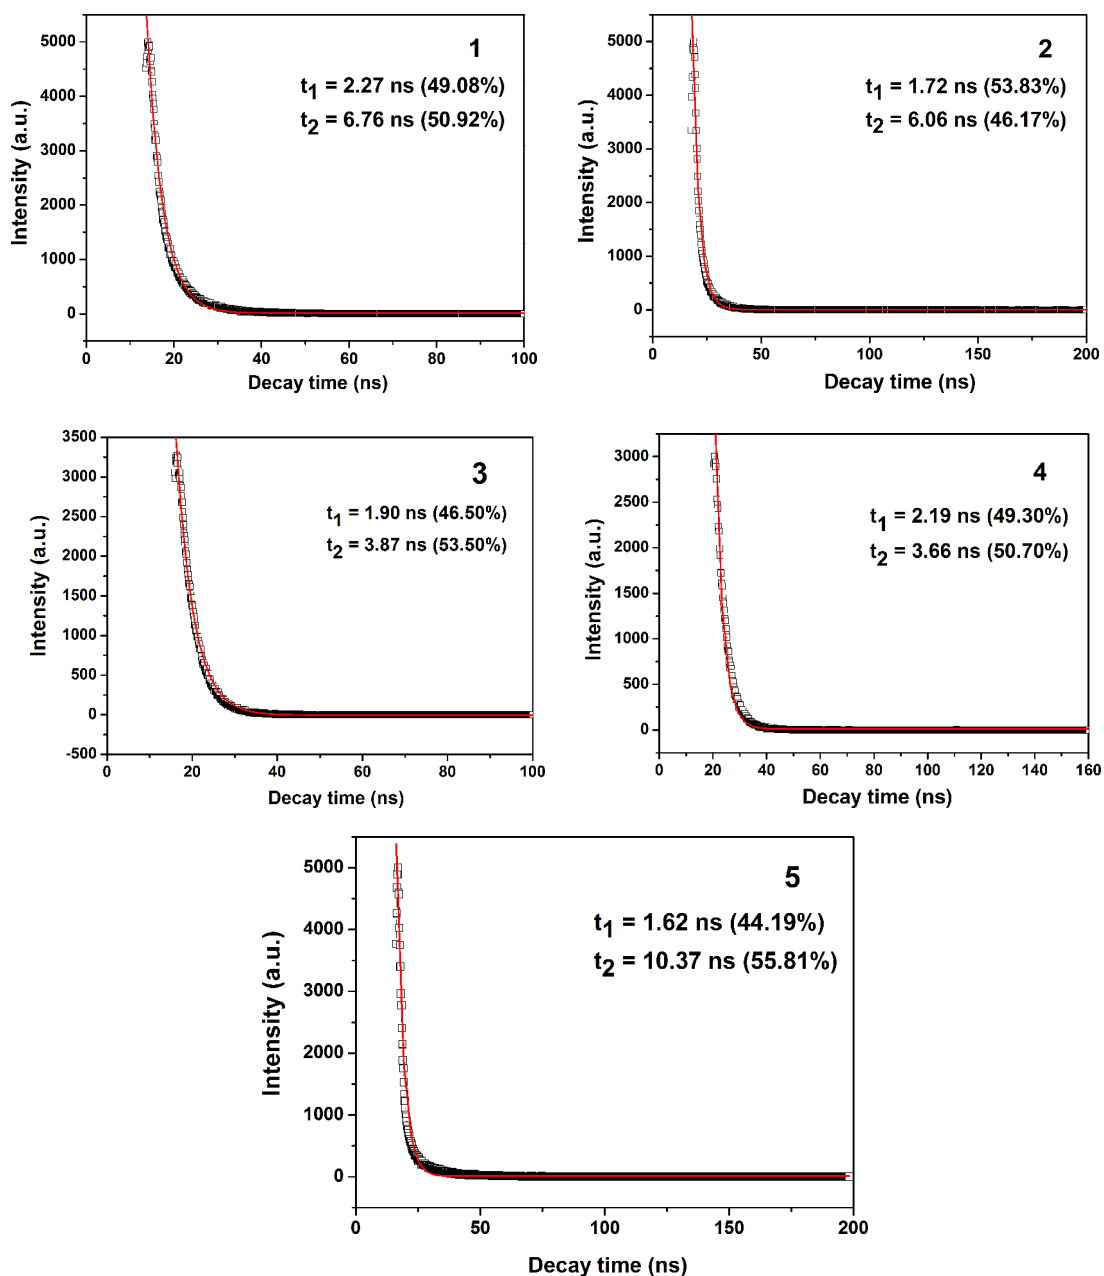

**Fig. S18** Fitted decay curves for **1-5**. The black circles represent experimental data, and the solid red lines represent fitting results.

**Table S1.** Hydrogen-bonding geometry parameters for **1**

| D-H...A        | d(D-H) (Å) | d(H...A) (Å) | d(D...A) (Å) | <(DHA) (°) |
|----------------|------------|--------------|--------------|------------|
| O1-H1...O2W    | 0.82       | 1.84         | 2.593(10)    | 152        |
| O1W-H1WA...O5  | 0.85       | 1.86         | 2.710(10)    | 178        |
| O1W-H1WB...N5  | 0.85       | 2.01         | 2.857(12)    | 178        |
| O2W-H2WA...O4  | 0.85       | 1.99         | 2.828(10)    | 167        |
| O2W-H2WB...O1W | 0.85       | 1.99         | 2.826(11)    | 167        |
| C15-H15...O6   | 0.93       | 2.43         | 3.259(11)    | 148        |

**Table S2.**  $\pi \cdots \pi$  interactions in **1**<sup>a</sup>

| Two rings   | Symmetry code  | Cg-Cg (Å) | Alpha (°) | Gamma (°) | CgI_Perp (Å) | CgJ_Perp (Å) |
|-------------|----------------|-----------|-----------|-----------|--------------|--------------|
| Cg(4)>Cg(4) | $1-x, -y, 2-z$ | 3.607(6)  | 0         | 17.61     | 3.439(4)     | 3.439(4)     |
| Cg(6)>Cg(6) | $-x, 1-y, 1-z$ | 3.864(5)  | 0         | 24.63     | -3.512(3)    | -3.512(3)    |

<sup>a</sup> Cg(4): N(1)>C(10)>N(3)>N(2)>C(11); Cg(6): C(1)>C(2)>C(3)>C(4)>C(5)>C(6); Alpha = Dihedral Angle between Planes I and J; Gamma = Angle Cg(I)>Cg(J) vector and normal to plane J; Cg-Cg = Distance between ring Centroids; CgI\_Perp = Perpendicular distance of Cg(I) on ring J; CgJ\_Perp = Perpendicular distance of Cg(J) on ring I.

**Table S3.** Hydrogen-bonding geometry parameters for **2**

| D-H...A        | d(D-H) (Å) | d(H...A) (Å) | d(D...A) (Å) | <(DHA) (°) |
|----------------|------------|--------------|--------------|------------|
| O1W-H1WA...O5  | 0.85       | 1.84         | 2.686(49)    | 178        |
| O1W-H1WB...O2W | 0.85       | 1.82         | 2.671(51)    | 178        |
| O2W-H2WA...O4  | 0.85       | 1.87         | 2.718(53)    | 173        |
| O2W-H2WB...O1  | 0.85       | 1.93         | 2.781(51)    | 173        |
| C10-H10...O6   | 0.93       | 2.47         | 3.384(60)    | 167        |
| C14-H14...O2W  | 0.93       | 2.36         | 3.223(103)   | 154        |

**Table S4.** C-H... $\pi$  interactions in **2**<sup>a</sup>

| C-H... $\pi$      | Symmetry code         | H-C(g) (Å) | X-H...C(g) (°) | X...C(g) (Å) |
|-------------------|-----------------------|------------|----------------|--------------|
| C(16)-H(16)>Cg(8) | $1/2-x, 1/2+y, 1/2-z$ | 2.86       | 132            | 3.579(4)     |

<sup>a</sup>Cg(8):C(4)>C(5)>C(6)>C(7)>C(8)>C(9)

**Table S5.**  $\pi$ ... $\pi$  interactions in **2**<sup>a</sup>

| Two rings   | Symmetry code   | Cg-Cg (Å) | Alpha (°) | Gamma (°) | CgI_Perp (Å) | CgJ_Perp (Å) |
|-------------|-----------------|-----------|-----------|-----------|--------------|--------------|
| Cg(8)>Cg(8) | $1-x, 2-y, 2-z$ | 3.839(6)  | 0         | 27.15     | 3.416(2)     | 3.418(2)     |

<sup>a</sup>Cg(5): C(4)>C(5)>C(6)>C(7)>C(8)>C(9); Alpha = Dihedral Angle between Planes I and J; Gamma = Angle Cg(I)>Cg(J) vector and normal to plane J; Cg-Cg = Distance between ring Centroids; CgI\_Perp = Perpendicular distance of Cg(I) on ring J; CgJ\_Perp = Perpendicular distance of Cg(J) on ring I.

**Table S6.** Hydrogen-bonding geometry parameters for **3**

| D-H...A       | d(D-H) (Å) | d(H...A) (Å) | d(D...A) (Å) | <(DHA) (°) |
|---------------|------------|--------------|--------------|------------|
| O3-H3...O6    | 0.82       | 1.82         | 2.602(3)     | 158        |
| C10-H10...O3  | 0.93       | 2.43         | 3.158(3)     | 135        |
| C12-H12A...O3 | 0.97       | 2.56         | 3.187(3)     | 123        |
| C20-H20A...N3 | 0.93       | 2.33         | 3.219(4)     | 160        |

**Table S7.** C-H... $\pi$  interactions in **3**<sup>a</sup>

| C-H... $\pi$ | Symmetry code | H-C(g) (Å) | X-H...C(g) (°) | X...C(g) (Å) |
|--------------|---------------|------------|----------------|--------------|
|--------------|---------------|------------|----------------|--------------|

|                     |                |      |     |          |
|---------------------|----------------|------|-----|----------|
| C(15)–H(15) > Cg(4) | $x, I+y, -I+z$ | 2.84 | 138 | 3.583(3) |
|---------------------|----------------|------|-----|----------|

<sup>a</sup>Cg(4): C(4) > C(5) > C(6) > C(7) > C(8) > C(9)

**Table S8.**  $\pi \cdots \pi$  interactions in **3**<sup>a</sup>.

| Two rings     | Symmetry code  | Cg–Cg (Å) | Alpha (°) | Gamma (°) | CgI_Perp (Å) | CgJ_Perp (Å) |
|---------------|----------------|-----------|-----------|-----------|--------------|--------------|
| Cg(3) > Cg(3) | $-x, I-y, 2-z$ | 3.858(14) | 0         | 21.12     | 3.599(10)    | 3.599(10)    |
| Cg(4) > Cg(4) | $I-x, -y, I-z$ | 3.593(12) | 0         | 14.54     | 3.478(8)     | 3.478(8)     |

<sup>a</sup>Cg(3): N(4) > C(20) > N(5) > N(6) > C(21); Cg(4): C(4) > C(5) > C(6) > C(7) > C(8) > C(9); Alpha = Dihedral Angle between Planes I and J; Gamma = Angle Cg(I) > Cg(J) vector and normal to plane J; Cg–Cg = Distance between ring Centroids; CgI\_Perp = Perpendicular distance of Cg(I) on ring J; CgJ\_Perp = Perpendicular distance of Cg(J) on ring I.

**Table S9.** Hydrogen-bonding geometry parameters for **4**.

| D–H $\cdots$ A       | d(D–H) (Å) | d(H $\cdots$ A) (Å) | d(D $\cdots$ A) (Å) | <(DHA) (°) |
|----------------------|------------|---------------------|---------------------|------------|
| O1W–H1WA $\cdots$ O3 | 0.86       | 1.83                | 2.688(6)            | 177        |
| O1W–H1WB $\cdots$ O5 | 0.86       | 1.94                | 2.764(7)            | 161        |
| O4–H4 $\cdots$ O2W   | 0.82       | 1.77                | 2.517(7)            | 150        |

**Table S10.**  $\pi \cdots \pi$  interactions in **4**<sup>a</sup>.

| Two rings     | Symmetry code   | Cg–Cg (Å) | Alpha (°) | Gamma (°) | CgI_Perp (Å) | CgJ_Perp (Å) |
|---------------|-----------------|-----------|-----------|-----------|--------------|--------------|
| Cg(2) > Cg(2) | $I-x, I-y, 2-z$ | 3.757(10) | 0         | 28.52     | –3.427(3)    | –3.427(3)    |
| Cg(3) > Cg(3) | $I-x, I-y, 2-z$ | 3.967(7)  | 0         | 29.02     | –3.469(5)    | –3.469(5)    |
| Cg(4) > Cg(4) | $I-x, -y, I-z$  | 3.678(3)  | 0         | 17.48     | –3.508(18)   | –3.508(18)   |

<sup>a</sup>Cg(2): N(4) > C(15) > N(6) > N(5) > C(16); Cg(3): N(4') > C(15) > N(6') > N(5') > C(16'); Cg(4): C(2) > C(3) > C(4) > C(6) > C(7) > C(9); Alpha = Dihedral Angle between Planes I and J; Gamma = Angle Cg(I) > Cg(J) vector and normal to plane J; Cg–Cg = Distance between ring Centroids; CgI\_Perp = Perpendicular distance of Cg(I) on ring J; CgJ\_Perp = Perpendicular distance of Cg(J) on ring I.

**Table S11.** Hydrogen-bonding geometry parameters for **5**.

| D–H $\cdots$ A        | d(D–H) (Å) | d(H $\cdots$ A) (Å) | d(D $\cdots$ A) (Å) | <(DHA) (°) |
|-----------------------|------------|---------------------|---------------------|------------|
| O3–H3A $\cdots$ O7    | 0.82       | 1.92                | 2.669(2)            | 152        |
| O6–H6 $\cdots$ O10    | 0.82       | 1.84                | 2.659(3)            | 173        |
| O8–H8 $\cdots$ N2     | 0.82       | 1.92                | 2.727(2)            | 169        |
| O9–H9 $\cdots$ O5     | 0.82       | 1.81                | 2.625 (3)           | 171        |
| O12–H12 $\cdots$ O2   | 0.82       | 1.76                | 2.550(2)            | 163        |
| C3–H3 $\cdots$ O12    | 0.93       | 2.29                | 3.190(3)            | 162'       |
| C14–H14 $\cdots$ O3   | 0.93       | 2.37                | 3.273(3)            | 164        |
| C21–H21A $\cdots$ O11 | 0.97       | 2.36                | 3.282(3)            | 158        |

|              |      |     |          |     |
|--------------|------|-----|----------|-----|
| C30–H30···O4 | 0.93 | 2.4 | 3.225(3) | 149 |
|--------------|------|-----|----------|-----|

**Table S12.**  $\pi \cdots \pi$  interactions in **5<sup>a</sup>**.

| Two rings   | Symmetry code        | Cg-Cg (Å) | Alpha (°) | Gamma (°) | CgI_Perp (Å) | CgJ_Perp (Å) |
|-------------|----------------------|-----------|-----------|-----------|--------------|--------------|
| Cg(1)>Cg(1) | <i>2-x, 1-y, 1-z</i> | 3.731(12) | 0.02      | 31.11     | 3.194(8)     | 3.194(8)     |
| Cg(3)>Cg(4) | <i>1-x, -y, -z</i>   | 3.791(12) | 0.93      | 26.79     | 3.385(8)     | 3.361(9)     |
| Cg(5)>Cg(5) | <i>2-x, -y, 1-z</i>  | 3.635(13) | 0.02      | 15.16     | 3.509(9)     | 3.509(9)     |

<sup>a</sup>Cg(1): N(1)>C(19)>N(3)>N(2)>C(20); Cg(3): C(2)>C(3)>C(4)>C(5)>C(6)>C(7); Cg(4): C(13)>C(14)>C(15)>C(16)>C(17)>C(18); Cg(5): C(22)>C(23)>C(24)>C(25)>C(27)>C(26); Alpha = Dihedral Angle between Planes I and J; Gamma = Angle Cg(I)>Cg(J) vector and normal to plane J; Cg-Cg = Distance between ring Centroids; CgI\_Perp = Perpendicular distance of Cg(I) on ring J; CgJ\_Perp = Perpendicular distance of Cg(J) on ring I.

**Table S13.** Selected bond lengths and angles of **1<sup>a</sup>**.

|                   |           |                   |          |
|-------------------|-----------|-------------------|----------|
| Zn(1)-O(6)        | 1.984(5)  | Zn(1)-N(4)        | 2.006(8) |
| Zn(1)-O(3)#1      | 2.006(5)  | Zn(1)-N(1)        | 2.020(7) |
| O(6)-Zn(1)-O(3)#1 | 96.05(18) | O(6)-Zn(1)-N(1)   | 117.3(2) |
| O(6)-Zn(1)-N(4)   | 112.9(2)  | O(3)#1-Zn(1)-N(1) | 127.3(2) |
| O(3)#1-Zn(1)-N(4) | 98.1(2)   | N(4)-Zn(1)-N(1)   | 103.9(3) |

<sup>a</sup>Symmetry code: #1, x+1, y, z.

**Table S14.** Selected bond lengths and angles of **2<sup>a</sup>**.

|                    |            |                     |            |
|--------------------|------------|---------------------|------------|
| Zn(1)-O(3)         | 1.971(3)   | Zn(2)-O(1)#2        | 1.994(4)   |
| Zn(1)-O(6)#1       | 1.978(3)   | Zn(2)-N(4)#2        | 2.037(6)   |
| Zn(1)-O(1W)        | 1.984(4)   | Zn(2)-N(4)          | 2.037(6)   |
| Zn(1)-N(1)         | 2.012(4)   | Zn(2)-O(1)          | 1.994(4)   |
| O(3)-Zn(1)-O(6)#1  | 100.11(13) | O(1)-Zn(2)-O(1)#2   | 123.3(2)   |
| O(3)-Zn(1)-O(1W)   | 104.38(15) | O(1)-Zn(2)-N(4)#2   | 105.27(19) |
| O(6)#1-Zn(1)-O(1W) | 105.88(14) | O(1)#2-Zn(2)-N(4)#2 | 112.7(2)   |
| O(3)-Zn(1)-N(1)    | 113.23(16) | O(1)-Zn(2)-N(4)     | 112.7(2)   |
| O(6)#1-Zn(1)-N(1)  | 118.71(16) | O(1)#2-Zn(2)-N(4)   | 105.27(19) |
| O(1W)-Zn(1)-N(1)   | 112.88(17) | N(4)#2-Zn(2)-N(4)   | 93.7(4)    |

<sup>a</sup>Symmetry code: #1, x+1, y, z; #2, -x+1, y, -z+3/2.

**Table S15.** Selected bond lengths and angles of **3<sup>a</sup>**.

|                   |            |                   |            |
|-------------------|------------|-------------------|------------|
| Zn(1)-O(5)#1      | 1.9718(15) | Zn(1)-N(1)        | 2.0093(18) |
| Zn(1)-O(2)        | 2.0047(15) | Zn(1)-N(4)        | 2.0355(18) |
| O(5)#1-Zn(1)-O(2) | 106.17(6)  | O(5)#1-Zn(1)-N(4) | 101.41(7)  |
| O(5)#1-Zn(1)-N(1) | 107.87(7)  | O(2)-Zn(1)-N(4)   | 110.16(7)  |
| O(2)-Zn(1)-N(1)   | 108.95(7)  | N(1)-Zn(1)-N(4)   | 121.08(7)  |

<sup>a</sup>Symmetry code: #1, x, y+1, z.

**Table S16.** Selected bond lengths and angles of **4<sup>a</sup>**.

|                    |            |                     |            |
|--------------------|------------|---------------------|------------|
| Cd(1)-N(4')        | 2.244(14)  | Cd(1)-O(2)          | 2.380(3)   |
| Cd(1)-O(6)#1       | 2.284(3)   | Cd(1)-N(4)          | 2.394(13)  |
| Cd(1)-N(1)         | 2.284(4)   | Cd(1)-O(1)          | 2.413(3)   |
| Cd(1)-O(1W)        | 2.348(3)   | Cd(1)-O(3)#1        | 2.696(3)   |
| N(4')-Cd(1)-O(6)#1 | 97.1(2)    | O(2)-Cd(1)-N(4)     | 91.2(3)    |
| N(4')-Cd(1)-N(1)   | 161.5(4)   | N(4')-Cd(1)-O(1)    | 105.4(4)   |
| O(6)#1-Cd(1)-N(1)  | 90.24(13)  | O(6)#1-Cd(1)-O(1)   | 82.28(10)  |
| N(4')-Cd(1)-O(1W)  | 77.8(3)    | N(1)-Cd(1)-O(1)     | 92.37(13)  |
| O(6)#1-Cd(1)-O(1W) | 139.58(12) | O(1W)-Cd(1)-O(1)    | 138.00(13) |
| N(1)-Cd(1)-O(1W)   | 85.62(15)  | O(2)-Cd(1)-O(1)     | 54.16(10)  |
| N(4')-Cd(1)-O(2)   | 85.2(3)    | N(4)-Cd(1)-O(1)     | 99.0(3)    |
| O(6)#1-Cd(1)-O(2)  | 134.88(10) | N(4')-Cd(1)-O(3)#1  | 86.7(3)    |
| N(1)-Cd(1)-O(2)    | 101.59(13) | O(6)#1-Cd(1)-O(3)#1 | 51.52(9)   |
| O(1W)-Cd(1)-O(2)   | 85.13(12)  | N(1)-Cd(1)-O(3)#1   | 84.62(12)  |
| N(4')-Cd(1)-N(4)   | 14.0(3)    | O(1W)-Cd(1)-O(3)#1  | 88.06(12)  |
| O(6)#1-Cd(1)-N(4)  | 83.9(3)    | O(2)-Cd(1)-O(3)#1   | 170.38(10) |
| N(1)-Cd(1)-N(4)    | 166.4(3)   | N(4)-Cd(1)-O(3)#1   | 82.1(3)    |
| O(1W)-Cd(1)-N(4)   | 90.9(3)    | O(1)-Cd(1)-O(3)#1   | 133.59(9)  |

<sup>a</sup>Symmetry code: #1, x-1, y, z.

**Table S17.** Selected bond lengths and angles of **5<sup>a</sup>**.

|                     |            |                     |            |
|---------------------|------------|---------------------|------------|
| Cd(1)-O(1)#1        | 2.3087(13) | Cd(1)-N(4)#1        | 2.3538(16) |
| Cd(1)-O(1)          | 2.3087(13) | Cd(1)-N(1)#1        | 2.3798(16) |
| Cd(1)-N(4)          | 2.3538(16) | Cd(1)-N(1)          | 2.3798(16) |
| O(1)#1-Cd(1)-O(1)   | 180        | N(4)-Cd(1)-N(1)#1   | 96.36(6)   |
| O(1)#1-Cd(1)-N(4)   | 94.42(6)   | N(4)#1-Cd(1)-N(1)#1 | 83.64(6)   |
| O(1)-Cd(1)-N(4)     | 85.58(6)   | O(1)#1-Cd(1)-N(1)   | 101.69(5)  |
| O(1)#1-Cd(1)-N(4)#1 | 85.58(6)   | O(1)-Cd(1)-N(1)     | 78.31(5)   |
| O(1)-Cd(1)-N(4)#1   | 94.42(6)   | N(4)-Cd(1)-N(1)     | 83.64(6)   |
| N(4)-Cd(1)-N(4)#1   | 180        | N(4)#1-Cd(1)-N(1)   | 96.36(6)   |
| O(1)#1-Cd(1)-N(1)#1 | 78.31(5)   | N(1)#1-Cd(1)-N(1)   | 180.000(1) |
| O(1)-Cd(1)-N(1)#1   | 101.69(5)  |                     |            |

<sup>a</sup>Symmetry code: #1, -x+1, -y+2, -z+1.
